# Supplementary material
Source: PubMed Central journal article supplement (PMC9105746)
Supplement: NIHMS1746145-supplement-Supplementary.pdf [file NIHMS1746145-supplement-Supplementary.pdf]

**Appendix. Rural-Urban Commuting Area codes (RUCA), 2000\***

| Names      | Primary and Secondary codes                                                                                                                                                                                                                                                                                                                                                                                                                                                                                                                                                                                                                                                                                                                                                                                                                                                                                                                                                                                                                                                                                                                                                                                                                                                                                                                                                                                                                                                                                                                                                                                                                                                                                                                                                                                                                                                                                                                                |
|------------|------------------------------------------------------------------------------------------------------------------------------------------------------------------------------------------------------------------------------------------------------------------------------------------------------------------------------------------------------------------------------------------------------------------------------------------------------------------------------------------------------------------------------------------------------------------------------------------------------------------------------------------------------------------------------------------------------------------------------------------------------------------------------------------------------------------------------------------------------------------------------------------------------------------------------------------------------------------------------------------------------------------------------------------------------------------------------------------------------------------------------------------------------------------------------------------------------------------------------------------------------------------------------------------------------------------------------------------------------------------------------------------------------------------------------------------------------------------------------------------------------------------------------------------------------------------------------------------------------------------------------------------------------------------------------------------------------------------------------------------------------------------------------------------------------------------------------------------------------------------------------------------------------------------------------------------------------------|
| RUCA codes | <p>1 Metropolitan area core: primary flow within an urbanized area (UA)</p> <p>    1 No additional code</p> <p>    1.1 Secondary flow 30% to 50% to a larger UA</p> <p>2 Metropolitan area high commuting: primary flow 30% or more to a UA</p> <p>    2 No additional code</p> <p>    2.1 Secondary flow 30% to 50% to a larger UA</p> <p>3 Metropolitan area low commuting: primary flow 5% to 30% to a UA</p> <p>    3 No additional code</p> <p>4 Micropolitan area core: primary flow within an Urban Cluster of 10,000 to 49,999 (large UC)</p> <p>    4 No additional code</p> <p>    4.1 Secondary flow 30% to 50% to a UA</p> <p>    4.2 Secondary flow 10% to 30% to a UA</p> <p>5 Micropolitan high commuting: primary flow 30% or more to a large UC</p> <p>    5 No additional code</p> <p>    5.1 Secondary flow 30% to 50% to a UA</p> <p>    5.2 Secondary flow 10% to 30% to a UA</p> <p>6 Micropolitan low commuting: primary flow 10% to 30% to a large UC</p> <p>    6 No additional code</p> <p>    6.1 Secondary flow 10% to 30% to a UA</p> <p>7 Small town core: primary flow within an Urban Cluster of 2,500 to 9,999 (small UC)</p> <p>    7 No additional code</p> <p>    7.1 Secondary flow 30% to 50% to a UA</p> <p>    7.2 Secondary flow 30% to 50% to a large UC</p> <p>    7.3 Secondary flow 10% to 30% to a UA</p> <p>    7.4 Secondary flow 10% to 30% to a large UC</p> <p>8 Small town high commuting: primary flow 30% or more to a small UC</p> <p>    8 No additional code</p> <p>    8.1 Secondary flow 30% to 50% to a UA</p> <p>    8.2 Secondary flow 30% to 50% to a large UC</p> <p>    8.3 Secondary flow 10% to 30% to a UA</p> <p>    8.4 Secondary flow 10% to 30% to a large UC</p> <p>9 Small town low commuting: primary flow 10% to 30% to a small UC</p> <p>    9 No additional code</p> <p>    9.1 Secondary flow 10% to 30% to a UA</p> <p>    9.2 Secondary flow 10% to 30% to a large UC</p> |

---

|  |                                                            |
|--|------------------------------------------------------------|
|  | 10 Rural areas: primary flow to a tract outside a UA or UC |
|  | 10 No additional code                                      |
|  | 10.1 Secondary flow 30% to 50% to a UA                     |
|  | 10.2 Secondary flow 30% to 50% to a large UC               |
|  | 10.3 Secondary flow 30% to 50% to a small UC               |
|  | 10.4 Secondary flow 10% to 30% to a UA                     |
|  | 10.5 Secondary flow 10% to 30% to a large UC               |
|  | 10.6 Secondary flow 10% to 30% to a small UC               |

---

|                                             |                                                                        |
|---------------------------------------------|------------------------------------------------------------------------|
| Categorization A of RUCA codes <sup>a</sup> | Urban: 1.0, 1.1, 2.0, 2.1, 3.0, 4.1, 5.1, 7.1, 8.1, and 10.1           |
|                                             | Large rural: 4.0, 4.2, 5.0, 5.2, 6.0, and 6.1                          |
|                                             | Small rural: 7.0, 7.2, 7.3, 7.4, 8.0, 8.2, 8.3, 8.4, 9.0, 9.1, and 9.2 |
|                                             | Isolated rural: 10.0, 10.2, 10.3, 10.4, 10.5, and 10.6                 |

---

**Note:** \* RUCA codes were developed by the United States Department of Agriculture Economic Research Service; <sup>a</sup>: categorization were according to Categorization A by the University of Washington Rural Health Research Center
